# Supplementary material for: Physicochemical Properties of 3D-Printed Polylactic Acid/Hydroxyapatite Scaffolds
Source: MDPI journal article supplement (doi:10.3390/polym15132849), 2023-06-28
Supplement: s1 [file s1]

**Table S1.** Volume of pores, in quantitative data obtained by micro-CT processing of images, of the 3D printed PLA/HA scaffolds with increasing infill density and/or HA contribution.

| <b>Volume fraction</b> | <b>PLA0HA</b> | <b>PLA3HA</b> | <b>PLA9HA</b> | <b>PLA13HA</b> |
|------------------------|---------------|---------------|---------------|----------------|
| infill 60%             | 60.089        | 59.017        | 76.730        | 50.569         |
| infill 70%             | 55.763        | 58.638        | 63.913        | 50.152         |
| infill 80%             | 58.110        | 54.479        | 62.227        | 53.000         |
| infill 90%             | 44.750        | 45.782        | 48.670        | 30.714         |
| infill 100%            | 24.590        | 36.271        | 39.499        | 29.500         |
